# Supplementary material for: Comparison of the Biochemical Properties and Roles in the Xyloglucan-Rich Biomass Degradation of a GH74 Xyloglucanase and Its CBM-Deleted Variant from Thielavia terrestris
Source: MDPI journal article supplement (doi:10.3390/ijms23095276), 2022-05-09
Supplement: s1 [file s1]

# Comparison of Biochemical Properties and Roles in Xyloglucan-rich Biomass Degradation of a GH74 Xyloglucanase and its CBM-deleted Variant from *Thielavia terrestris*

Beibei Wang, Kaixiang Chen, Peiyu Zhang, Liangkun Long and Shaojun Ding \*

Jiangsu Co-Innovation Center of Efficient Processing and Utilization of Forest Resources, College of Chemical Engineering, Nanjing Forestry University, Nanjing 210037, China; jason22@njfu.edu.cn (B.W.); chenkaixiang@njfu.edu.cn (K.C.); zhangpeiyu@njfu.edu.cn (P.Z.); longlk602@njfu.edu.cn (L.L.)

\* Correspondence: dshaojun@njfu.edu.cn or dshaojun@hotmail.com; Tel.: +86 25 85427939; Fax: +86 25 85418873

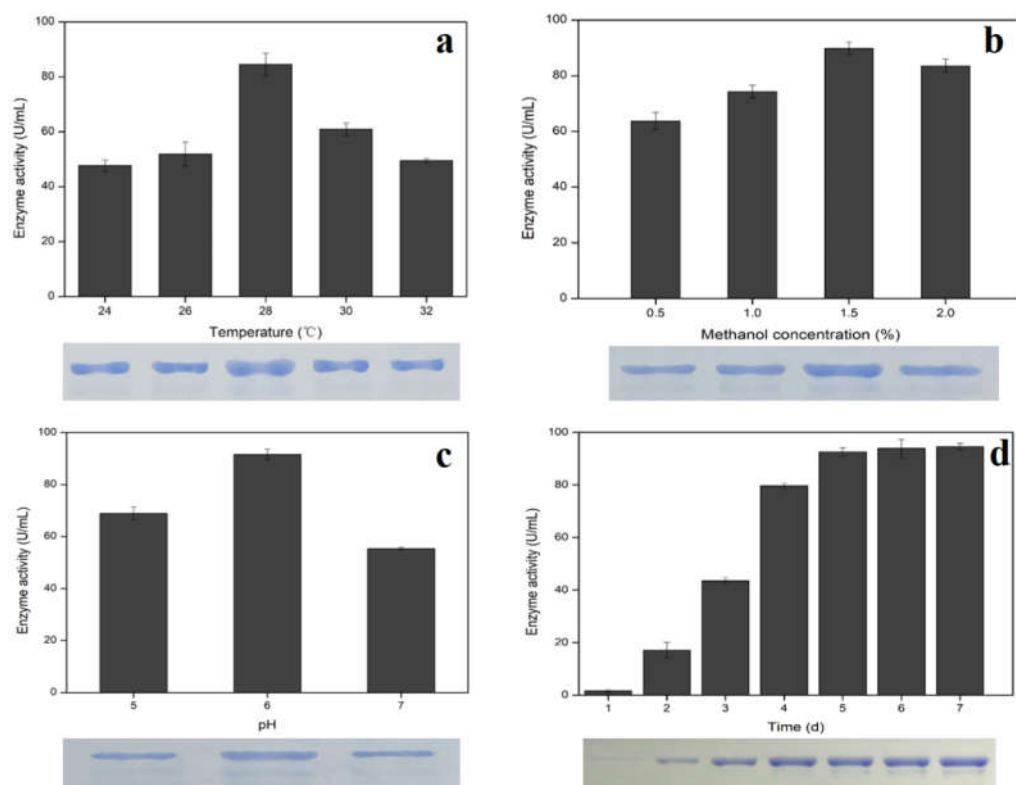

**Figure S1.** Effect of temperature (a), methanol concentration (b), pH of the medium (c) and induction time (d) on enzyme activity of *TtGH74* and expression levels shown on the gels.

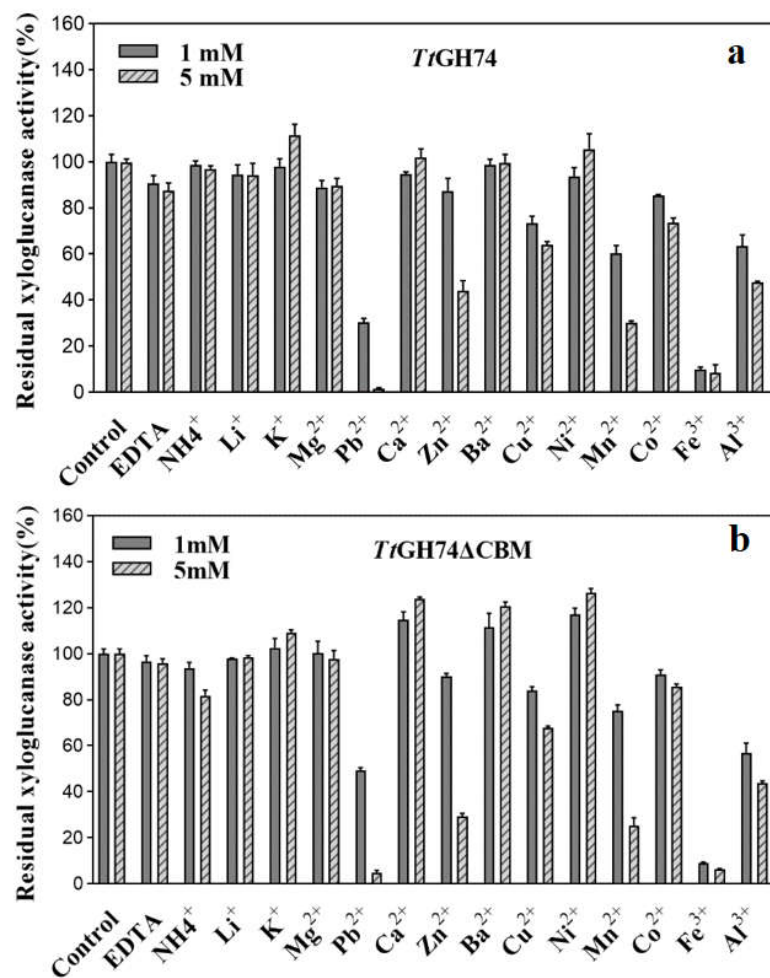

Figure S2. Effect of metals ions (1 and 5 mM) on the *TtGH74* (a) and *TtGH74ΔCBM* (b) activity.

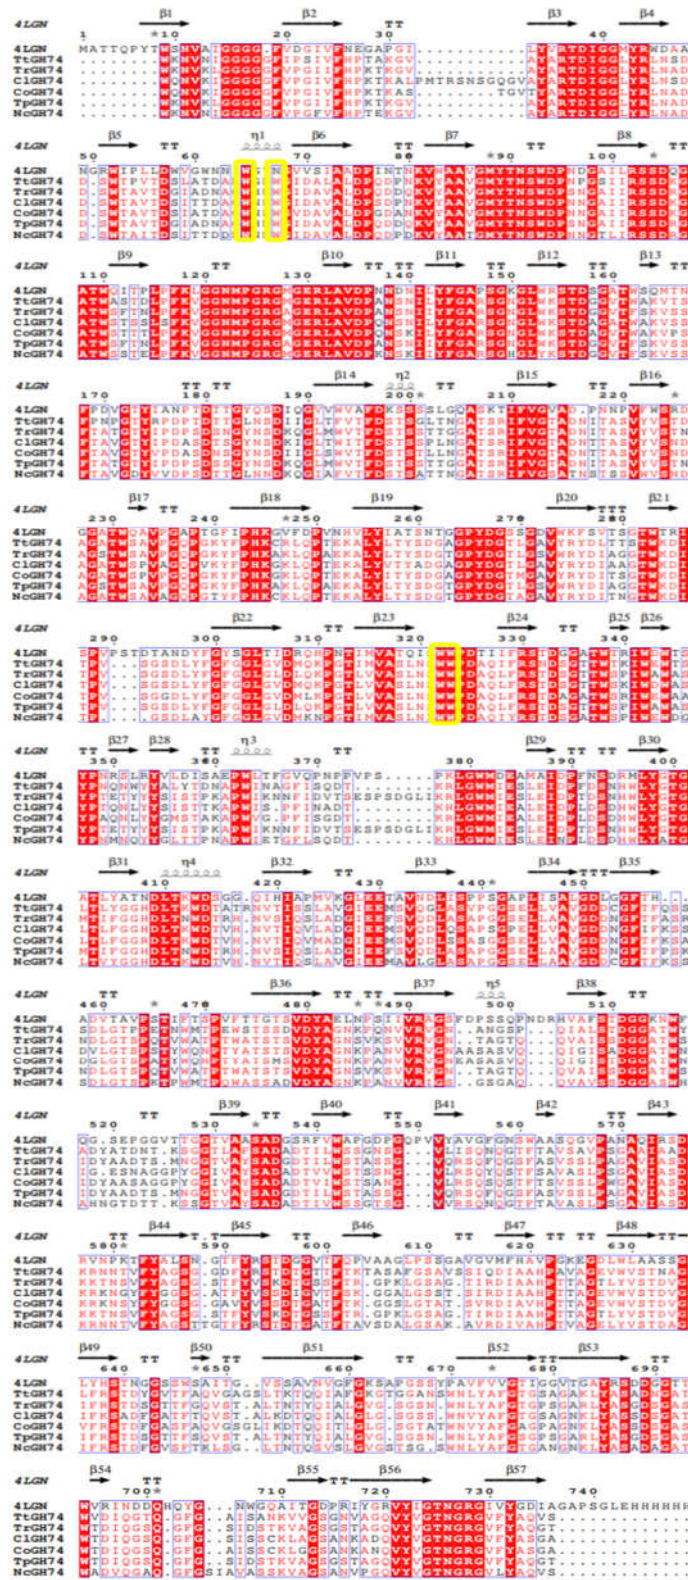

**Figure S3.** Multiple sequence alignments between *TrGH74* and GH74 xyloglucanases from other fungal strains (*Trichoderma reesei* GH74 XP\_006966240.1; *Coniochaeta ligniaria* GH74 OIW24422.1; *Coniochaeta sp.* GH74 KAB556692.1; *Trichoderma parareesei* GH74 OTA06671.1; *Neurospora crassa* GH74 XP\_958569.1). Conserved tryptophan residues were indicated by the yellow boxes.

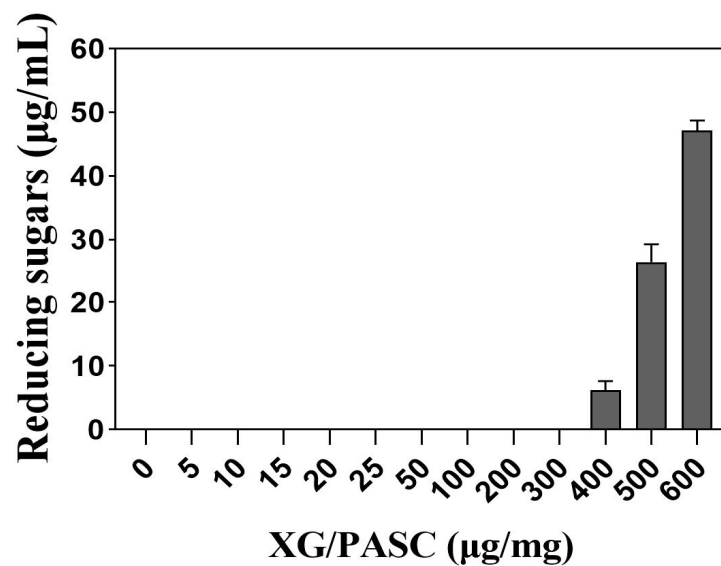

**Figure S4.** The reducing sugars released from the free XG in supernatant of XG-coated PASC mixture by extensively hydrolysis of overdose *TtGH74*. The reducing sugar was measured by the DNS method.

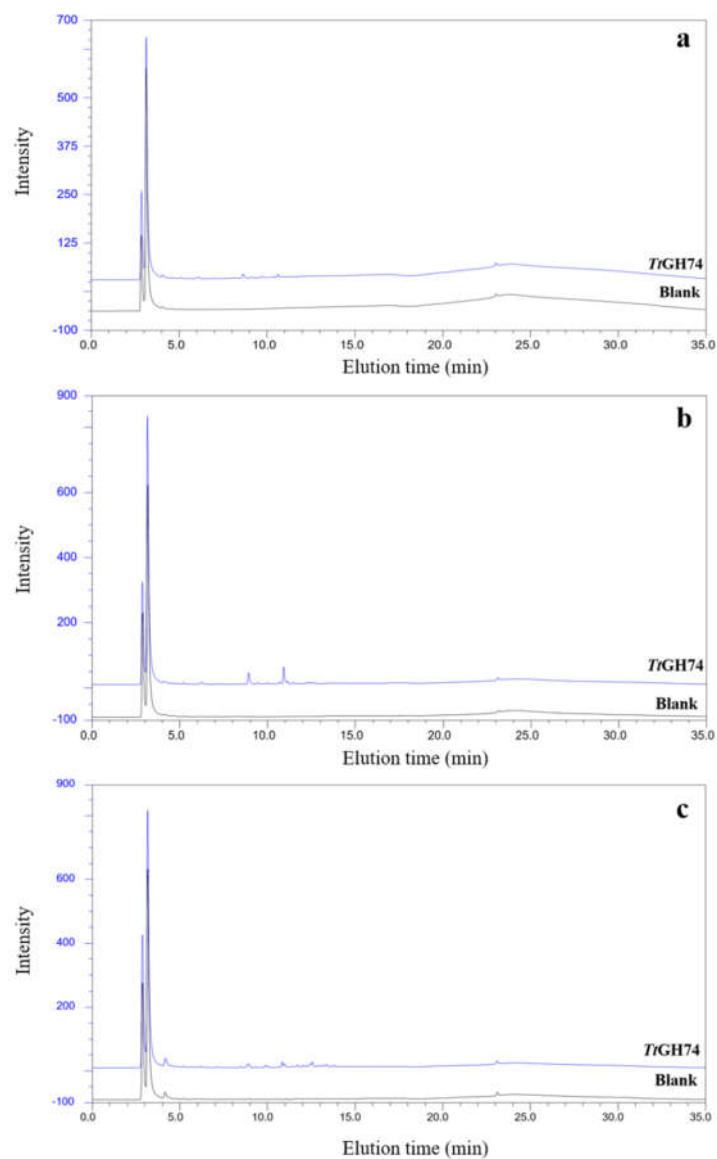

**Figure S5.** HPAEC-PAD analysis of reaction products generated by *TtGH74* from alkali treated residues of sulfuric acid pretreated-corn bran (a), DES pretreated-corn bran (b) and DES pretreated-apple pomace (c). The blank in the HPAEC-PAD represents a control experiment without *TtGH74*.
